# Supplementary material
Source: publisher figshare collection journal article supplement (https://acs.figshare.com/ndownloader/files/6494466)
Supplement: Supplementary file 1 [file 6494466]

## *Supporting Information*

# Pickering Emulsion as an Efficient Platform for Enzymatic Reactions without Stirring

Lijuan Wei,<sup>†</sup> Ming Zhang,<sup>†</sup> Xiaoming Zhang,<sup>†</sup> Hongchuan Xin,<sup>‡</sup> and Hengquan Yang<sup>\*†</sup>

<sup>†</sup>School of Chemistry and Chemical Engineering, Shanxi University, Taiyuan 030006, China

<sup>‡</sup>Key Laboratory of Biofuels, Qingdao Institute of Bioenergy and Bioprocess Technology, Chinese Academy of Sciences, Qingdao 266101, China

### **Experimental section**

**Figure S1.** TEM images, N<sub>2</sub> sorption isotherms and EDX spectrum of the emulsifier

**Figure S2.** XPS spectrum of emulsifier

**Figure S3.** Water contact angle of the emulsifier pellet

**Figure S4.** Droplet diameter distributions of the Pickering emulsion systems with different amounts of emulsifier

**Figure S5.** Oil–water interfacial area (S) and surface coverage (C) of emulsifier versus the emulsifier amount

## Experimental section

**Chemicals.** Native Lipase B from *Candida antarctica* (CALB) was purchased from Novozymes. (R, S)-1-phenylethyl acetate (98%), (R, S)- $\alpha$ -methylbenzyl butyrate (98%) and (R, S)-1-octen-3-yl acetate (97%) were purchased from Adamas Reagent Co., Ltd, (China). (R, S)-2-octanol acetate (98%) and (R, S)-4-methyl-2-pentanol acetate (TEOS, AR), from Alfa Aesar. (MeO)<sub>3</sub>SiCH<sub>3</sub> (98%) and acetyl chloride (98%) were purchased from Aladdin (China). Cyclohexane (AR), n-hexanol (AR), tetraethyl orthosilicate (TEOS, AR) phosphoric acid (85%), Coomassie Brilliant Blue G-250 (CBB), bovine serum albumin (BSA) and ammonia (NH<sub>3</sub>·H<sub>2</sub>O, 25 wt %) were purchased from Sinopharm Chemical Reagent Co., Ltd, (China). Triton X-10 (TX-10, 98%) was obtained from Guangzhou Reagent Company (China). Deionized water was used in this study.

**SiO<sub>2</sub> emulsifier preparation.** SiO<sub>2</sub> nanospheres were synthesized according to our previous procedure.<sup>1</sup> 1.5 g of as-synthesized SiO<sub>2</sub> nanospheres (dried at 120 °C for 4 h) was dispersed into toluene (8 mL). Into this suspension, a mixture of 4.5 mmol (MeO)<sub>3</sub>SiCH<sub>3</sub> and 4.5 mmol N(C<sub>2</sub>H<sub>5</sub>)<sub>3</sub> were added. After heating under reflux for 4 h under a N<sub>2</sub> atmosphere, the solid material was isolated by centrifugation, washed four times with toluene and dried, yielding methyl-modified silica particles as emulsifier.

**Labelling enzyme with Rhodamine B.** 2 mL native CALB was dispersed into 2 mL PBS (phosphate buffer: 0.1 M Na<sub>2</sub>HPO<sub>4</sub>-0.1 M NaH<sub>2</sub>PO<sub>4</sub>, pH 7.0), leading to a suspension. 100  $\mu$ L (0.3 mg ml<sup>-1</sup>) Rhodamine B was added to the above suspension. After stirring 12 h at room temperature in the dark, the solid were isolated by centrifugation. After being washed four times with PBS, Rhodamine B-labelling CALB was obtained.

**Characterization.** Samples for transmission electron microscope (TEM) observations were prepared by dispersing the sample powder in ethanol using ultrasound and then allowing a drop of the suspension to evaporate on a copper grid covered with a holey carbon film. TEM images of methyl-modified SiO<sub>2</sub> nanospheres were obtained on a JEOL-JEM-2000EX instrument (operated at 120 kV). Energy-dispersive X-ray spectrum (EDX) was achieved on a field emission transmission electron microscope equipped with an energy dispersive spectrometer (FEI Tecnai G2 F20, 200 kV). Nitrogen-sorption experiments were performed at -196 °C on a Micromeritics ASAP2020 system. Before measuring, the sample was out gassed at 120 °C under vacuum for 6 h. The surface area was calculated from the adsorption branch in the relative pressure range of 0.05–0.15 using the Brunauer–Emmett–Teller (BET) method. X-ray photoelectron spectrum (XPS) were recorded on a Kratos Axis Ultra DLD, and the C 1s line at 284.9 eV was used as a reference. The contact angles of water in air on silica particle disks were measured using a Krüss DSA100 instrument. Before measurement, the powder sample was compressed into a disk with a thickness of approximately 1 mm (ca. 2 MPa). A drop of water (1  $\mu$ L) was injected on the sample disk. The appearance of the water drop was recorded at ca. 0.1 s with a digital camera. Contact angle was determined by a photogrametric method. The size of emulsion droplets was examined using an optical microscopy (XSP-8CA, Shanghai, China) equipped with 10  $\times$  magnification lens. Gas chromatography (GC) analysis was carried out on an Agilent 7890A instrument (Agilent-113-2532, Chiral Cyclodex-B, 30 m  $\times$  320  $\mu$ m  $\times$  0.25  $\mu$ m), with a flame ionization detector.

**Determination of protein content (Bradford method).** Coomassie Brilliant Blue G-250 (100 mg, CBB) and 100 mL of phosphoric acid (85% w/v) were dispersed into 50 mL of ethanol (95%). The resulting solution was then diluted to 1 L with deionized water. The final composition of this solution is 0.01% (w/v) Coomassie Brilliant Blue G-250, 4.7% (w/v) ethanol, and 8.5% (w/v) phosphoric acid.

**Protein assay.** A UV-vis standard curve for Bovine Serum Albumin (BSA) assay was obtained using different protein concentrations with 0.02, 0.04, 0.06, 0.08 and 0.1 mg mL<sup>-1</sup>. 1 mL of a sample solution was added into 4 mL of CBB solution. The resultant mixture was incubated for 10 min at room temperature for UV-vis determination (595 nm). The blank experiment was also conducted in the absence of protein.

**Determination of the amount of enzyme adsorbed onto the emulsifier.** The experimental procedure of the Pickering emulsion preparation is the same with the reaction systems except the absence of reactant. After standing for 6 h, the Pickering emulsion was subjected to demulsification through centrifugation, to separate the aqueous solution. The concentration of CALB in this aqueous solution was determined using UV-vis spectroscopy, as the aforementioned procedure. The amount of enzyme adsorbed onto the emulsifier was calculated through comparing the enzyme concentrations before and after adsorption.

#### Calculations of the surface coverage C

$$C = m_p D / 4 \rho_p V_d d_p$$

where  $m_p$  is the mass of solid particle emulsifier,  $D$  is the average diameter of an emulsion droplet,  $\rho_p$  is the density of the solid particle emulsifier (2.65 g cm<sup>-3</sup>),  $V_d$  is the volume of water and  $d_p$  is the solid particle diameter.<sup>2</sup>

#### Calculations of the conversion and enantiomeric excess of ester ( $ee_s$ ) and alcohol ( $ee_p$ ).

$$ee_s = \frac{[\text{ester}]_S - [\text{ester}]_R}{[\text{ester}]_S + [\text{ester}]_R} \times 100\%$$

$$ee_p = \frac{[\text{alcohol}]_R - [\text{alcohol}]_S}{[\text{alcohol}]_R + [\text{alcohol}]_S} \times 100\%$$

$$\text{Conv. \%} = ee_s / (ee_p + ee_s) \times 100\%$$

**Reference**

**Reference**

Pickering emulsions with stimuable particles:  
from highly-to weakly-covered interfaces.  
*Phys. Chem. Chem. Phys.* **2007**, 9, 6455-6462

- (1) Kong, D.; Zhang, C.; Xu, Z.; Li, G.; Hou Z.; Lin, J. Tunable photoluminescence in monodisperse silica spheres. *J. Colloid Interface Sci.*, **2010**, 352, 278-284.
- (2) Gautier, F.; Destribats, M.; Perrier-Cornet, R.; Dechézelles, J. F.; Giermanska, J.; Héroguez, V.; Ravaine, S.; Leal-Calderon, F.; Schmitt, V. *Phys. Chem. Chem. Phys.* **2007**, 9, 6455.

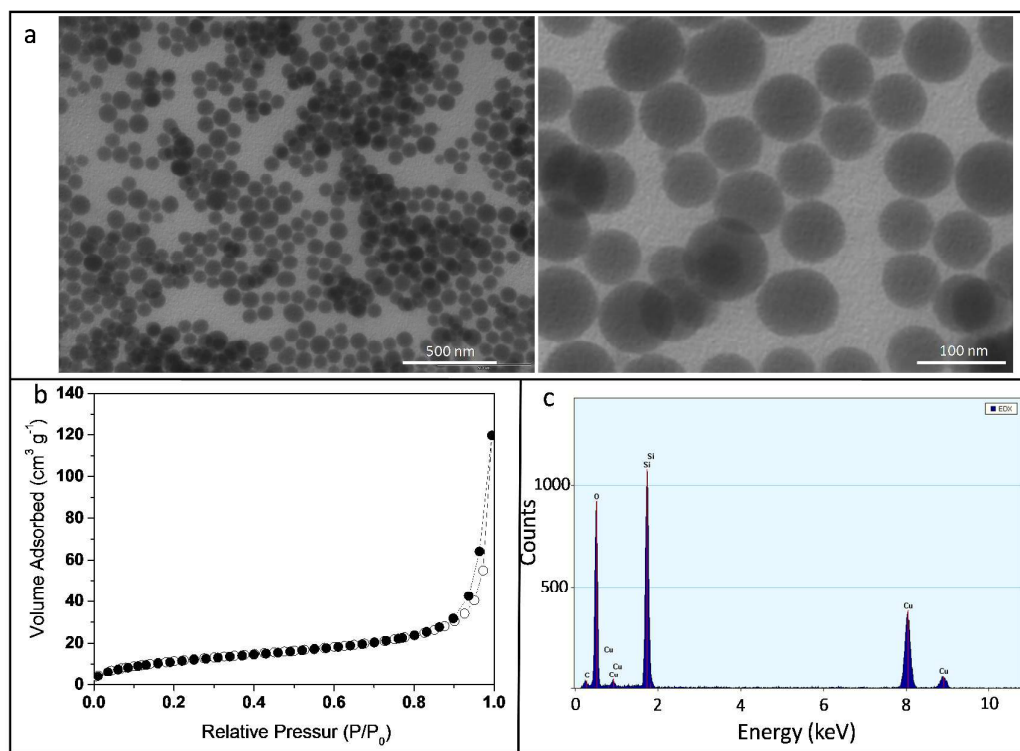

**Figure S1.** TEM images (a), N<sub>2</sub> adsorption-desorption isotherms (b) and energy-dispersive X-ray spectrum (EDX) (c) of the emulsifier.

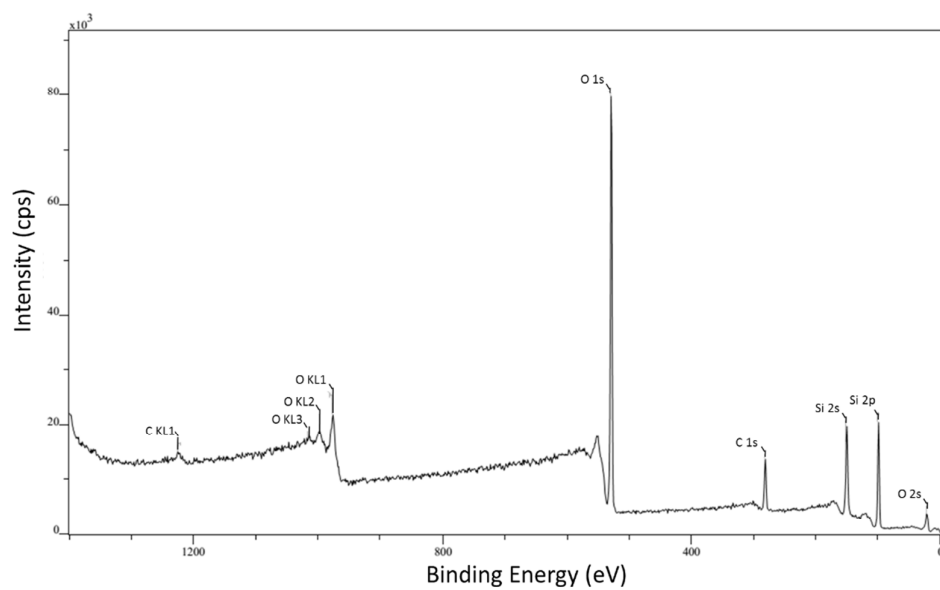

**Figure S2.** X-Ray photoelectron spectrum (XPS) of the emulsifier.

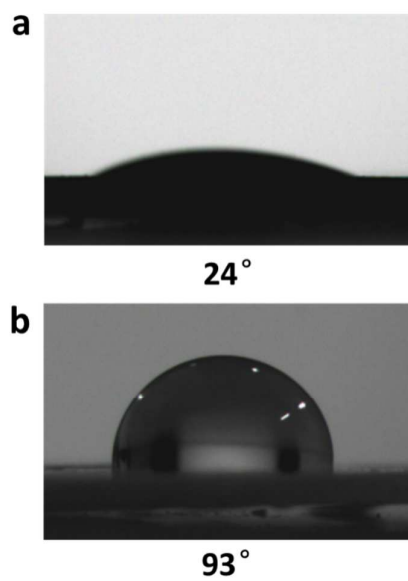

**Figure S3.** Water contact angle of the unmodified silica pellet (a) and the emulsifier pellet (b).

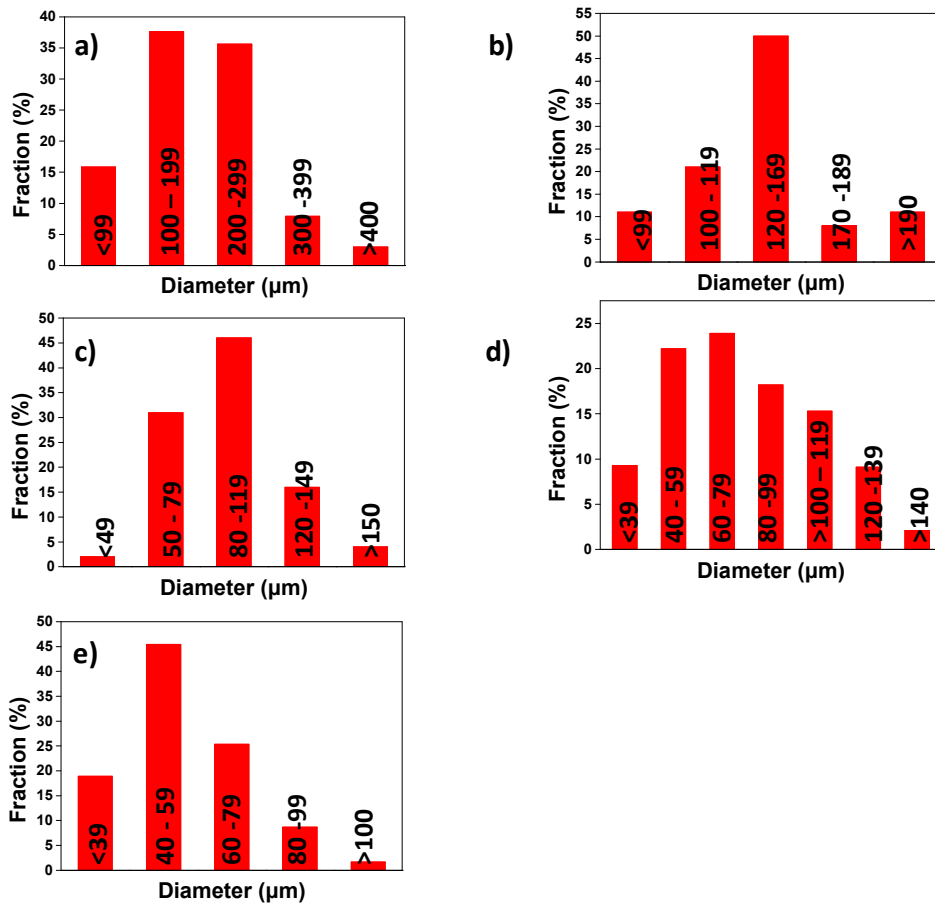

**Figure S4.** Amount of emulsifier (wt.%) distributions of the Pickering emulsion systems with different amounts of emulsifier: (a) 0.25 wt %, (b) 0.5 wt %, (c) 1 wt %, (d) 2 wt %, (e) 3 wt %.

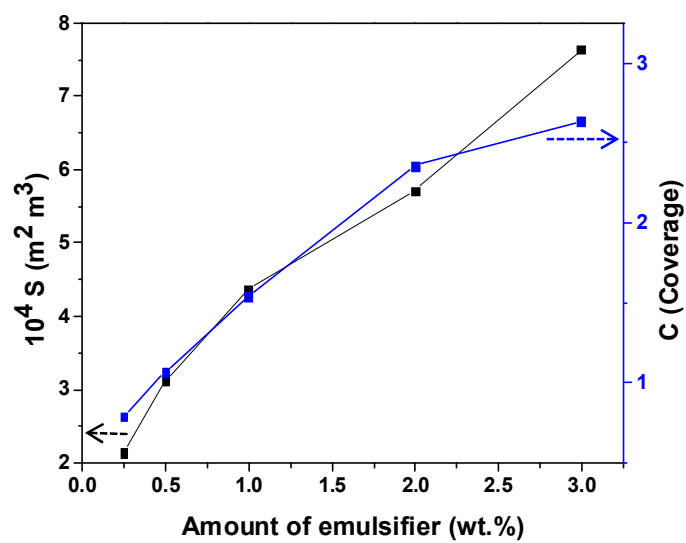

**Figure S5.** Oil–water interfacial area (S) and surface coverage (C) of emulsifier versus the emulsifier amount.
